# Supplementary material for: Nonlinear co-generation of graphene plasmons for optoelectronic logic gates
Source: Research Square preprint supplement (doi:10.21203/rs.3.rs-1204181/v1), 2022-01-12
Supplement: Supplementary file 1 [file 2e5542bfbe3348d801a86a67.docx]

*Supplementary Information for*

**Nonlinear co-generation of graphene plasmons for optoelectronic logic gates**

Yiwei Li1,#, Ning An1,#, Zheyi Lu2,#, Yuchen Wang1, Bing Chang1, Teng Tan1,3, Xuhan Guo4, Xizhen Xu5, Jun He5, Handing Xia6, Zhaohui Wu6, Yikai Su4, Yuan Liu2,*, Yunjiang Rao1,3,*, Giancarlo Soavi7,8*, Baicheng Yao1,*

*1Key Laboratory of Optical Fibre Sensing and Communications (Education Ministry of China), University of Electronic Science and Technology of China, Chengdu, China.*

*2Key Laboratory for Micro-Nano Optoelectronic Devices (Education Ministry of China), School of Physics and Electronics, Hunan University, Changsha, China.*

*3Research Centre for Optical Fibre Sensing, Zhejiang Laboratory, Hangzhou, China.*

*4State Key Laboratory of Advanced Optical Communication Systems and Networks, Shanghai Jiao Tong University, Shanghai, China.*

*5Guangdong and Hong Kong Joint Research Center for Optical Fiber Sensors, Shenzhen University, Shenzhen, China.*

*6Research Center of Laser Fusion, China Academic of Engineering Physics, Mianyang 621900, China.*

*7Institute of Solid State Physics, Friedrich Schiller University Jena, Jena, Germany.*

*8Abbe Center of Photonics, Friedrich Schiller University Jena, Jena, Germany.*

*#These authors contributed equally.*

**Corresponding authors:*

[*yaobaicheng@uestc.edu.cn*](mailto:yaobaicheng@uestc.edu.cn)*;* [*giancarlo.soavi@uni-jena.de*](mailto:giancarlo.soavi@uni-jena.de)*;*

[*yuanliuhnu@hnu.edu.cn*](mailto:yuanliuhnu@hnu.edu.cn)*;* [*yjrao@uestc.edu.cn*](mailto:yjrao@uestc.edu.cn)

**S1. Theoretical analysis.**

Both the pump and probe pulses propagate inside the fiber and interact with graphene via evanescent field. The DFG relies on the in-fiber phase matching, hence we first investigate the effective refractive index of the GDF geometry for the optical mode (TM polarized HE11). **Fig. S1a** shows the modelling of the cross-sectional view of our GDF. The material of the fiber is silica, with refractive index of the core/cladding of 1.452/1.446. On the D-plane and close to the core, the 0.5 nm thick graphene is modelled as an ultrathin metal, with intraband and interband conductivities [1,2,3]

(S1-A)

(S1-B)

Here *EF* is the Fermi level, *τ* = 10-13 s is the scattering time, *T* is the temperature, *f* is the frequency, *ħ* = 1.05×*10-34* eV·s is the reduced Planck constant, *kB* = 1.38×*10-23J*/K is the Boltzmann’s constant, and *e = -1.61×10-19C* is the unit charge. Such conductivity is a complex number, and its effective permittivity and refractive index are determined by its complex conductivity:

(S2)

For propagating optical modes, *ng,r* influences the phase velocity while *ng,i* refers to the propagation loss. For example, for light with wavelength of 1600 nm and a Fermi level of 0.2eV, |*ng*| is ≈ 3.61. The calculation of the graphene’s dispersion was discussed in details in previous studies [4].

By using the finite-element method with the commercial software COMSOL multiphysics, we simulated the electrical field distributions of the GDF (core diameter 6 μm) for several optical wavelengths (**Fig. S1b** maps). In **Fig. S1c**, we plot the calculated frequency dependent effective refractive index (or the dispersion) of the TM-HE11 mode in the GDF. A lower effective refractive index enables a higher overlap between light and graphene. A higher optical frequency also corresponds to a higher effective refractive index (and thus lower overlap): in particular for 1550 nm wavelength (192 THz) we have 3% optical energy overlaps with graphene, while for 1923 nm wavelength (156 THz) we have 8% optical energy overlaps with graphene.

**Fig. S1 | Optical transmission in the GDF. a,** Schematic geometry of the GDF. **b,** Simulated electrical field distributions of the fundamental mode (TM polarized HE11) in the GDF. **c,** Correlation of the optical frequency and the effective refractive index of the D-shaped fiber.

Then we discuss the χ(2) nonlinearity of graphene on the D-shaped fiber, and the phase matching condition to be satisfied for the plasmonic generation. For the DFG based plasmon generation, the pump photons (*fpump* in the C band) are converted into probe photons (*fprobe* in the C band) and plasmons (*fsp* in the THz band). During this process, also the optical momentum must be conserved (phase-matching). Considering *k = 2π/λ = 2πneff/cT = 2πfneff/c*, where *neff* is the effective refractive index and *c* is the speed of light in vacuum, with the counter-propagating pump-probe geometry, we write the energy conservation and phase-matching conditions as

(S3)

Here *np*, *ns*, and *nsp* are the effective indexes of the pump, probe and the plasmon respectively. To satisfy the phase-matching condition, *fpump*, *fprobe* and *nsp* should be selected and adjusted carefully to achieve:

(S4)

Besides the phase-matching, the resonant dispersion of graphene also plays a key role in the plasmonic generation: graphene’s plasmons can only be excited in the polariton resonances, where *ksp* and *fsp* follow the Euler equation of motion. For ordinary Schrödinger fermions with mass *m*b, the Drude weight is given by *D* = π*e*2*n*/*m*b. Without considering any phonon coupling, the Drude weight of (non-interacting) massless Dirac fermions is given by *D* = 4*EFσuni*/*ħ* [5]. Hence one can write the Drude curve as

(S5)

Here *ε* is the conductivity of the medium. Another important condition to realize the co-excitation of multiple plasmon-polaritons with different frequencies is the plasmon-phonon coupling, as a plasmon-phonon interaction in the dispersion map splits the Drude curve into two branches [6,7]. For graphene deposited on silica, one should consider two phonons: the longitudinal optical phonon with *fLO* = 24 THz, and the surface optical phonon with *fSO* = 36 THz [8]. **Fig. S2a-2c** plot the ‘*fSP-k*’ dispersions when |*EF*| = 0.1 to 0.3 eV.

**Fig. S2 | Plasmon dispersion and phase matching of GDF. a-c,** Calculated frequency-momentum dispersions for graphene plasmons. Blue curves show the Drude dispersion of graphene, the red lines show the DFG phase matching condition when *fpump* = 192 THz. The longitudinal optical (LO) and surface optical (SO) phonon modes are marked as dashed lines at frequencies 24 THz and 36 THz. **d-f,** Simulated RPA maps of graphene for Fermi levels. The color bar is the normalized 1/|*Im[εRPA(f,****k****)]|*.

Considering the linear response theory and within the random phase approximation, one can calculate the imaginary part of the Lindhard function, which determines the lifetime of the plasmons. By using the simplified random phase approximation method [9], one can write the polariton permittivity of graphene *εRPA(f,****k****) = (ε1+ε2)/2-2πe2/****k****П(f,****k****)*, here *ε1* and *ε2* are upper and lower media permittivity (in our case, air and silica fiber), and *П(f,****k****)* is the polarizability. For finite doping, *П(f,****k****)* could be written as

(S6)

The imaginary part of *εRPA(f,****k****)* describes the resonant intensity of the plasmons. **Fig. S2d-f** map the 1/|*Im[εRPA(f,****k****)]|* for different doping values. In the RPA analysis, the influence of electron-phonon interactions on the polariton permittivity *εRPA(f,****k****)* is included as

(S7)

Here *d* is the distance between the graphene layer and the substrate while *α* ≈ 1/6 is the air-silica dielectric mismatch.

In addition, also the second order nonlinear susceptibility *χ(2)* of graphene on a silica substrate plays a key role for plasmonic generation *via* DFG. As discussed in Ref. [10], for light propagating with a wavevector ***k*** parallel to the graphene plane and *fpump* ≈ *fprobe*, the effective *χ(2)* [11], determined by the geometrical asymmetry, can be written as

(S8)

Here *ħkF* = *ħ(2meEF)1/2* *kF* is the Fermi momentum, and *γ* is the scattering ratio. We map the simulated *χeff(2)* in **Fig. S3**, with a fixed *fpump* = 192 THz. We note that a higher *EF* leads to a lower *χeff (2)*, but a higher *EF* enables a smaller 1/|*Im[εRPA(f,****k****)]|*.

**Fig. S3 | 2nd-order nonlinear susceptibility of the GDF.** Here we map the *χeff(2)* for different values of *fsp* from 5 to 45 THz, increasing *EF* from 0.1 to 0.3 eV and a fixed pump frequency of 192 THz. In the color bar, *χeff(2)* changes from 5.6×10-7 esu to 7.1×10-7 esu.

**S2. Nanofabrication and characterization of the device.**

**Fig. S4a** shows the nanofabrication steps for the GDF device. In *step 1*, a commercial single mode silica fiber (Corning RC-1550) is utilized, with fiber core diameter 6 μm and transmission loss < 0.5 dB/km at 1550 nm. For better nanofabrication and to increase its stability, the fiber is fixed on a glass substrate. The fiber is then mechanically side-polished in *step 2*, under an optical microscope and an on-line transmission power monitor. After polishing, we obtain a D-shaped fiber. The length of the D-shaped region is 2 mm and the surface of the D-shaped region is smooth on a nm scale. This guarantees that the scattering losses induced by the process are negligible [12]. In the D-shaped fiber, the distance between the core and the air is almost 0, ensuring strong light-graphene interaction. In *step 3* and *step 4*, a chemical vapor deposition (CVD) grown graphene monolayer is transferred onto the chip using PMMA and the wet-transfer method [13]. The PMMA is then removed using acetone. Next, in *step 5* and *step 6*, the Ti/Au (20/50 nm) contact pads (source and drain) are deposited on the D-shaped fiber by electron beam evaporation. When tuning the voltage between these two gold contacts, the Fermi level of graphene can be modulated. **Fig. S4b** shows the optical microscope images of the device.

**Fig. S4 | Device fabrication. a,** Fabrication steps. **b,** Top-view optical microscope images, from left to right: silica D-shaped fiber; the GDF transmitting red light (633 nm); GDF with electrodes, the width of the Au-graphene-Au transistor channel is 200 μm.

Besides *I-V* measurement, we characterize the |*EF*| of our graphene device for different values of the *VD* voltage by means of *in-situ* Raman spectroscopy (Renishaw InVia: 514 nm laser excitation, on-sample power <1 mW, integration time 1 s). **Fig. S5a** plots a typical Raman spectrum of our GDF device (no external voltage), the G and 2D peaks reveal the single layer graphene nature. The half-width of the G peak at ≈ 1586 cm-1is ≈ 26 cm-1, and the 2D peak is at ≈ 2681 cm-1, withFWHM ≈ 40 cm-1. The G/2D intensity ratio is ≈ 0.7. The on-fiber deposition enables phonon couplings and induces defects. Indeed, we observe a clear D peak at 1340 cm-1, a small D+D’’ peak at 2462 cm-1, and a minor D+D’ peak at 2961 cm-1. These asymmetric phonon scattering peaks also contribute to the χ(2) and the plasmon-phonon coupling.

To characterize the VD based Fermi level tuning, we plot the in-situ modification of the G peak and 2D peak obtained from measurement and determined by the density functional theory [14]. The shift of the Fermi level induced by VD enables a spectral shift for both the G peak and the 2D peak, depending on the carrier density. When the VD increases from 0.16 V to 1 V, as mentioned in the main text, we estimate the |EF| of the graphene on fiber to be in the range 0 eV to 0.4 eV due to external electrons injection. To verify this, **Fig. S5b** and **Fig. S5c** plot the G peak and the 2D peak for different values of VD. When VD = 0 V, 0.5 V, and 1 V, the G peak shifts from 1588 cm-1 to 1594 cm-1, while the 2D peak shifts from 2681 cm-1 to 2675 cm-1. In this process, the G peak intensity increases, but the 2D peak intensity decreases, and thus the IG/I2D ratio changes from 0.7 to 1.

**Fig. S5 | In-situ Raman spectroscopic measurements. a,** Raman spectrum of the GDF. The D, G, D’, D+D’, D+D’’, and 2D peaks are marked. **b,** Measured Raman spectra at different VD, for the G peak (top) and the 2D peak (bottom). Here the VD is tuned from 0 V, to 0.5 V and 1 V, corresponding to |EF| tuning from < 0.1 eV to ≈ 0.4 eV.

**S3. Experimental set-up and extended measurements.**

**Fig. S6** shows our f-2f frequency comb (probe) covering the NIR~MIR band. Typically, the DFG signal that satisfies the phase-matching condition is found by scanning the pump wavelength, although an ultra-broadband (e.g., from C band to MIR band) tunable laser is hard to obtain. On the other, a supercontinuum laser comb perfectly meets the requirement of DFG. In addition, because the DFG signals are weak, previous studies often used lock-in amplification and temporal integration [10,15] for the detection. In this work, two synchronized combs with the same repetition are overlapped in time and offer a sufficiently high peak power for on-line DFG detection.

First, a stabilized mode locked laser with central wavelength 1560 nm is used as the pump. The same laser is super-continuum broadened to an f-2f comb inside a highly nonlinear fiber (HNLF). We show the home-made comb device in **Fig. S6a**: this could be realized in a compact and turn-key device. The FROG maps of the laser comb before and after supercontinuum broadening are shown in **Fig. S6b**. The retrieved pulse width for the pump and probe combs are ≈ 430 fs and ≈ 110 fs respectively. Here **Fig. S6c** plots the electrical self-beating notes of the laser comb source: the repetition is 38 MHz, and the SNR of the first beating-line is higher than 70 dB. **Fig. S6d** plots the typical relative intensity noise (RIN) of our frequency comb source: < -100 dBc/Hz at 1kHz and < -140 dBc/Hz at 500 kHz. In the range 0 ~ 1 MHz, the total RIN is < 115 dB. This shoes that the power of the pump and probe pulses is highly stable, ensuring high accuracy for the plasmonic detection via measurement of the ΔIDFG.

**Fig. S6 | Characterization of the fiber laser frequency combs. a,** Device picture and FROG maps before and after supercontinuum generation. **b,** Measured self-beat-note of the comb source, in the range 0 ~ 1 GHz. Here over 200 beating lines are demonstrated. The SNR of each is > 70 dB, demonstrating the high stability of the light source. **c,** Measured RIN of the comb source (free running).

**Fig. S7a** and **S7b** show our experimental set-up for the DFG based plasmonic generation. The pump comb is launched into the GDF device from left to right, its peak power can be amplified up to 2kW, corresponding to a peak power density > 4 GW/cm2 inside the fiber core. By further spanning this comb via EDFA and highly nonlinear fiber with dispersion compensation, we obtain the probe comb, which covers the wavelength region 1100 nm - 2200 nm, with outstanding spectral flatness in the region 1600 nm - 2000 nm. The probe comb is launched into the GDF device from right to left. The polarization of the counter launched light is fixed to TM by using a pair of fiber polarization controllers. The two light beams are coupled in by using two 1:9 couplers. The GDF is fixed in a temperature controlled chamber to reduce ambient noise. A four-probe electrical stage integrated inside the chamber is used to apply the driving voltage. We tune the temporal delay between the pump and probe pulses by using a high precision motorized delay line (Thorlabs OD 220/M).

When the two pulses overlap in time and the phase-matching condition is satisfied, DFG will occur and we can detect the ΔIDFG on the probe comb spectrum, while a plasmon is generated in the THz band. The plasmon frequency fsp is equal to the difference between the pump and probe frequencies (energy conservation). To further verify the DFG process when the two pulses overlap in time, we verify that ΔIDFG is modulated by the pump comb. As shown in **Fig. S7a**, we can modulate at 500 kHz the pump pulse via an AOM and we observe the same modulation on the ΔIDFG, as shown in **Fig. S7c**. Such modulation only appears at the specific frequency satisfying the phase matching condition.

**Fig. S7 | Experimental set-up and DFG. a,** Sketch of the counter-pumped set-up. AOM: amplitude optical modulator, SC: super-continuum, PC: polarization controller, OSA: optical spectrum analyzer, ESA: electrical spectrum analyzer, OSC: oscilloscope. **b,** Schematic of the experimental operation, when the two pulses overlap in time, the DFG occurs and we detect the ΔIDFG at specific frequencies. **c,** Measured beat note spectrum of the probe comb. Besides the repetition frequency lines (n×38 MHz), a 500 kHz modulation in induces via modulation of the pump comb, as expected for the DFG process.

As mentioned in the main text, the three logic gates (AND, OR, NOR) are obtained by selective filtering of the DFG signal. Thanks to our all-fiber system, we can use three band-pass filters (BPF) based on fiber-Bragg gratings to select the three ΔIDFG at different frequencies. **Fig. S8a** shows the reflection spectra of the three BPFs at the output port of the probe. BPF1 is used as ‘NOR’ gate, with central wavelength 1624 nm and bandwidth 2 nm, BPF2 is used as ‘OR’ gate, with central wavelength 1815 nm and bandwidth 1.8 nm, BPF3 is used as ‘AND’ gate, with central wavelength 1930 nm and bandwidth 2.4 nm. The central wavelength of the filters can be slightly tuned via a piezo (≈ ± 5 nm) to optimize the detection of the ΔIDFG signal. **Fig. S8b** illustrates the reflected intensity uncertainty (<5%) of the three BPFs for a 5 minutes measurement while **Fig. S8c** shows the extinction ratio of the three BPFs.

**Fig. S8 | Characterization of the bandpass filters. a,** Reflection spectra of the 3 BPFs, which are used as outputs for the logic gates NOR, OR, AND. Here the pink, yellow and dark blue shadows mark the selected ΔIDFG regions when the GDF operates in the NOR, OR, AND states respectively. **b,** Intensity uncertainty of the three BPFs. **c,** Measured extinction ratio of the three BPFs, the extinction ratio of each BPF is much larger than its uncertainty.

**Supplementary references**

1. Mikhailov, S. A. & Ziegler, K. New electromagnetic mode in graphene. *Phys. Rev. Lett.* **99**, 016803 (2007).

2. Vakil, A. & Engheta, N. Transformation optics using graphene. *Science* **332**, 1291–1294 (2011).

3. Bonaccorso, F., Sun, Z., Hasan, T. & Ferrari, A. C. Graphene photonics and optoelectronics. *Nat. Photonics* **4**, 611–622 (2010).

4. Yao, B. *et al.* Gate-tunable frequency combs in graphene–nitride microresonators. *Nature* **558**, 410–414 (2018).

5. Grigorenko, A. N., Polini, M. & Novoselov, K. S. Graphene plasmonics. *Nat. Photonics* **6**, 749–758 (2012).

6. Basov, D. N., Fogler, M. M. & Garcia de Abajo, F. J. Polaritons in van der Waals materials. *Science* **354**, aag1992–aag1992 (2016).

7. Hwang, E. H., Sensarma, R. & Das Sarma, S. Plasmon-phonon coupling in graphene. *Phys. Rev. B* **82**, 195406 (2010).

8. Low, T. & Avouris, P. Graphene Plasmonics for Terahertz to Mid-Infrared Applications. *ACS Nano* **8**, 1086–1101 (2014).

9. Kotov, V. N., Uchoa, B., Pereira, V. M., Guinea, F. & Castro Neto, A. H. Electron-Electron Interactions in Graphene: Current Status and Perspectives. *Rev. Mod. Phys.* **84**, 1067–1125 (2012).

10. Yao, B. *et al.* Broadband gate-tunable terahertz plasmons in graphene heterostructures. *Nat. Photonics* **12**, 22–28 (2018).

11. Yao, X., Tokman, M. & Belyanin, A. Efficient Nonlinear Generation of THz Plasmons in Graphene and Topological Insulators. *Phys. Rev. Lett.* **112**, 055501 (2014).

12. An, N. *et al.* Electrically Tunable Four-Wave-Mixing in Graphene Heterogeneous Fiber for Individual Gas Molecule Detection. *Nano Lett.* **20**, 6473–6480 (2020).

13. An, N. *et al.* Electrically Tunable Four-Wave-Mixing in Graphene Heterogeneous Fiber for Individual Gas Molecule Detection. *Nano Lett.* **20**, 6473–6480 (2020).

14. Das, A. *et al.* Monitoring dopants by Raman scattering in an electrochemically top-gated graphene transistor. *Nat. Nanotechnol.* **3**, 210–215 (2008).

15. Constant, T. J., Hornett, S. M., Chang, D. E. & Hendry, E. All-optical generation of surface plasmons in graphene. *Nat. Phys.* **12**, 124–127 (2016).
